# Supplementary material
Source: PubMed Central journal article supplement (PMC4250953)
Supplement: Supp_Figure1.pdf [file Supp_Figure1.pdf]

## Supplementary Data

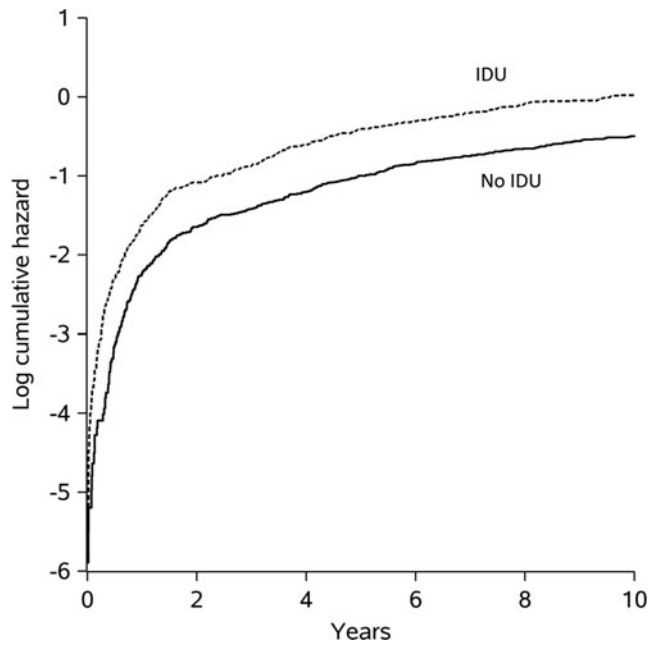

**SUPPLEMENTARY FIG. S1.** Estimated log cumulative hazard curves without accounting for any covariates calculated for 1,164 HIV-infected women with and without a history of injection drug use (IDU) in the Women's Inter-agency HIV Study December 6, 1995 through December 6, 2005
