# Supplementary material
Source: PubMed Central journal article supplement (PMC4250953)
Supplement: Supp_Figure2.pdf [file Supp_Figure2.pdf]

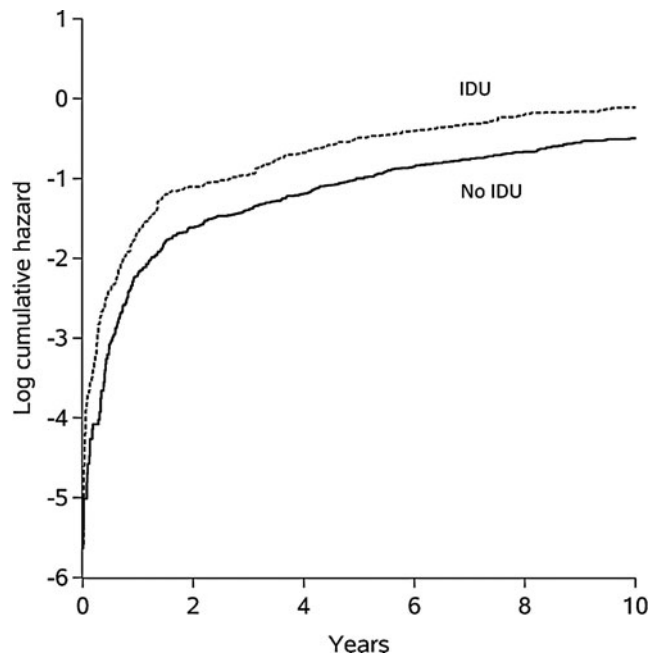

**SUPPLEMENTARY FIG. S2.** Standardized estimates of the log cumulative hazard curves [accounting for age, race, nadir CD4, and antiretroviral therapy (ART) initiation] calculated for 1,164 HIV-infected women with and without a history of injection drug use (IDU) in the Women's Interagency HIV Study December 6, 1995 through December 6, 2005
