# Supplementary material
Source: PubMed Central journal article supplement (PMC4250953)
Supplement: Supp_Table1.pdf [file Supp_Table1.pdf]

SUPPLEMENTARY TABLE S1. EXAMPLE OF INDIVIDUAL-LEVEL ESTIMATED EXPOSURE WEIGHTS,  
 DROP OUT WEIGHTS, AND COMBINED WEIGHTS FOR 1,164 HIV-INFECTED WOMEN  
 IN THE WOMEN'S INTERAGENCY HIV STUDY DECEMBER 6, 1995 THROUGH DECEMBER 6, 2005

| <i>ID</i> | <i>Time in</i> | <i>Time out</i> | <i>History of injection drug use (IDU)</i> | <i>Event</i> | <i>Drop out</i> | <i>Exposure weight</i> | <i>Drop out weight</i> | <i>Combined weight</i> |
|-----------|----------------|-----------------|--------------------------------------------|--------------|-----------------|------------------------|------------------------|------------------------|
| 34        | 0.00           | 0.08            | Yes                                        | No           | No              | 0.499                  | 1.000                  | 0.499                  |
| 34        | 0.08           | 0.17            | Yes                                        | No           | No              | 0.499                  | 1.001                  | 0.499                  |
| 34        | 0.17           | 0.21            | Yes                                        | No           | Yes             | 0.499                  | 1.001                  | 0.500                  |
| 36        | 0.00           | 0.08            | No                                         | No           | No              | 1.135                  | 1.000                  | 1.135                  |
| 36        | 0.08           | 0.17            | No                                         | No           | No              | 1.135                  | 1.001                  | 1.136                  |
| 36        | 0.17           | 0.22            | No                                         | No           | Yes             | 1.135                  | 1.001                  | 1.136                  |
| 37        | 0.00           | 0.08            | Yes                                        | No           | No              | 1.061                  | 1.000                  | 1.061                  |
| 37        | 0.08           | 0.17            | Yes                                        | No           | No              | 1.061                  | 1.000                  | 1.060                  |
| 37        | 0.17           | 0.23            | Yes                                        | Yes          | No              | 1.061                  | 1.000                  | 1.060                  |
| 38        | 0.00           | 0.08            | No                                         | No           | No              | 0.961                  | 1.000                  | 0.961                  |
| 38        | 0.08           | 0.17            | No                                         | No           | No              | 0.961                  | 0.999                  | 0.961                  |
| 38        | 0.17           | 0.25            | No                                         | No           | No              | 0.961                  | 0.999                  | 0.960                  |
| 38        | 0.25           | 0.33            | No                                         | No           | No              | 0.961                  | 0.998                  | 0.959                  |
| 38        | 0.33           | 0.42            | No                                         | No           | No              | 0.961                  | 0.997                  | 0.958                  |
| 38        | 0.42           | 0.43            | No                                         | Yes          | No              | 0.961                  | 0.996                  | 0.957                  |
| 66        | 0.00           | 0.08            | Yes                                        | No           | No              | 0.558                  | 1.000                  | 0.558                  |
| 66        | 0.08           | 0.17            | Yes                                        | No           | No              | 0.558                  | 0.999                  | 0.558                  |
| 66        | 0.17           | 0.25            | Yes                                        | No           | No              | 0.558                  | 0.999                  | 0.558                  |
| 66        | 0.25           | 0.33            | Yes                                        | No           | No              | 0.558                  | 0.998                  | 0.557                  |
| 66        | 0.33           | 0.38            | Yes                                        | No           | Yes             | 0.558                  | 0.998                  | 0.557                  |
